# Supplementary material
Source: PubMed Central journal article supplement (PMC5718049)
Supplement: NIHMS830352-supplement-8.pdf [file NIHMS830352-supplement-8.pdf]

**Table S1. Demographics of Human Donors, PD and Healthy Controls; Related to Figures 6 and 7**

| Pair | ID  | Disease Duration | UPDRS      | HY stage   | Constipation duration | Constipation severity scale | Constipation Before or After PD Diagnosis | Gender | Age | Race             | BMI  | Medications                                  |
|------|-----|------------------|------------|------------|-----------------------|-----------------------------|-------------------------------------------|--------|-----|------------------|------|----------------------------------------------|
| 1    | PD1 | 4                | 28         | 2          | 1.5                   | 1                           | After                                     | Male   | 55  | Caucasian        | 25.7 | None                                         |
| 1    | HC1 | <i>n/a</i>       | <i>n/a</i> | <i>n/a</i> | <i>n/a</i>            | <i>n/a</i>                  | <i>n/a</i>                                | Male   | 57  | Caucasian        | 36   | None                                         |
| 2    | PD2 | 1                | 27         | 2          | <i>n/a</i>            | <i>n/a</i>                  | <i>n/a</i>                                | Male   | 66  | Caucasian        | 27.3 | Aspirin 81mg/d                               |
| 2    | HC2 | <i>n/a</i>       | <i>n/a</i> | <i>n/a</i> | <i>n/a</i>            | <i>n/a</i>                  | <i>n/a</i>                                | Male   | 61  | Caucasian        | 28.6 | None                                         |
| 3    | PD3 | 2                | 27         | 2          | <i>n/a</i>            | <i>n/a</i>                  | <i>n/a</i>                                | Male   | 57  | Caucasian        | 23.7 | Sertraline 150mg/d;<br>BupropriionXL 300mg/d |
| 3    | HC3 | <i>n/a</i>       | <i>n/a</i> | <i>n/a</i> | <i>n/a</i>            | <i>n/a</i>                  | <i>n/a</i>                                | Male   | 55  | Caucasian        | 26.8 | None                                         |
| 4    | PD4 | 2                | 16         | 1          | 5                     | 2                           | Before                                    | Female | 46  | Caucasian        | 26.6 | None                                         |
| 4    | HC4 | <i>n/a</i>       | <i>n/a</i> | <i>n/a</i> | <i>n/a</i>            | <i>n/a</i>                  | <i>n/a</i>                                | Female | 50  | African American | 28.6 | None                                         |
| 5    | PD5 | 8                | 18         | 2          | <i>n/a</i>            | <i>n/a</i>                  | <i>n/a</i>                                | Male   | 49  | Caucasian        | 27.5 | None                                         |
| 5    | HC5 |                  |            |            |                       |                             |                                           | Male   | 43  | Caucasian        | 29   | None                                         |
| 6    | PD6 | 1                | 15         | 1.5        | 30                    | 7                           | Before                                    | Female | 56  | Caucasian        | 22   | Ranitidine 150mg/d                           |
| 6    | HC6 | <i>n/a</i>       | <i>n/a</i> | <i>n/a</i> | <i>n/a</i>            | <i>n/a</i>                  | <i>n/a</i>                                | Female | 57  | Caucasian        | 22   | None                                         |

**Table S1.** Demographic data of fecal donors for each PD and healthy donor pair. UPDRS = unified Parkinson’s disease rating scale; HY stage = Hoehn and Yahr scale; BMI = body mass index.
