# Supplementary material
Source: PubMed Central journal article supplement (PMC5718049)

Figure S1

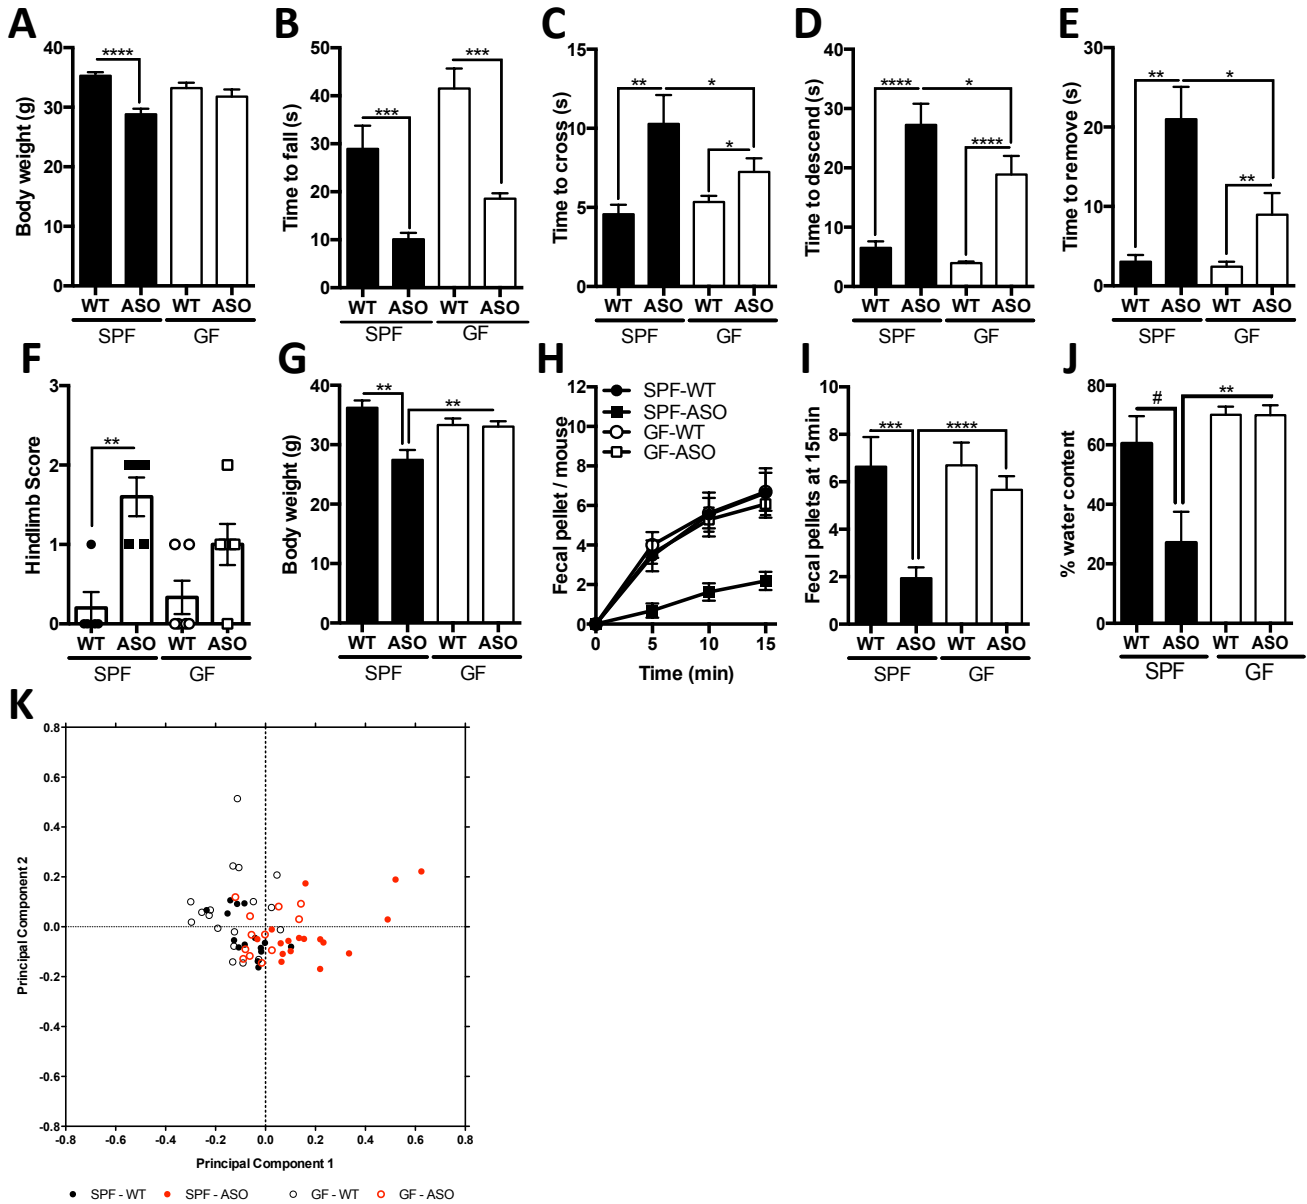

Supplement: NIHMS830352-supplement-1.pdf [file NIHMS830352-supplement-1.pdf]

Figure S2

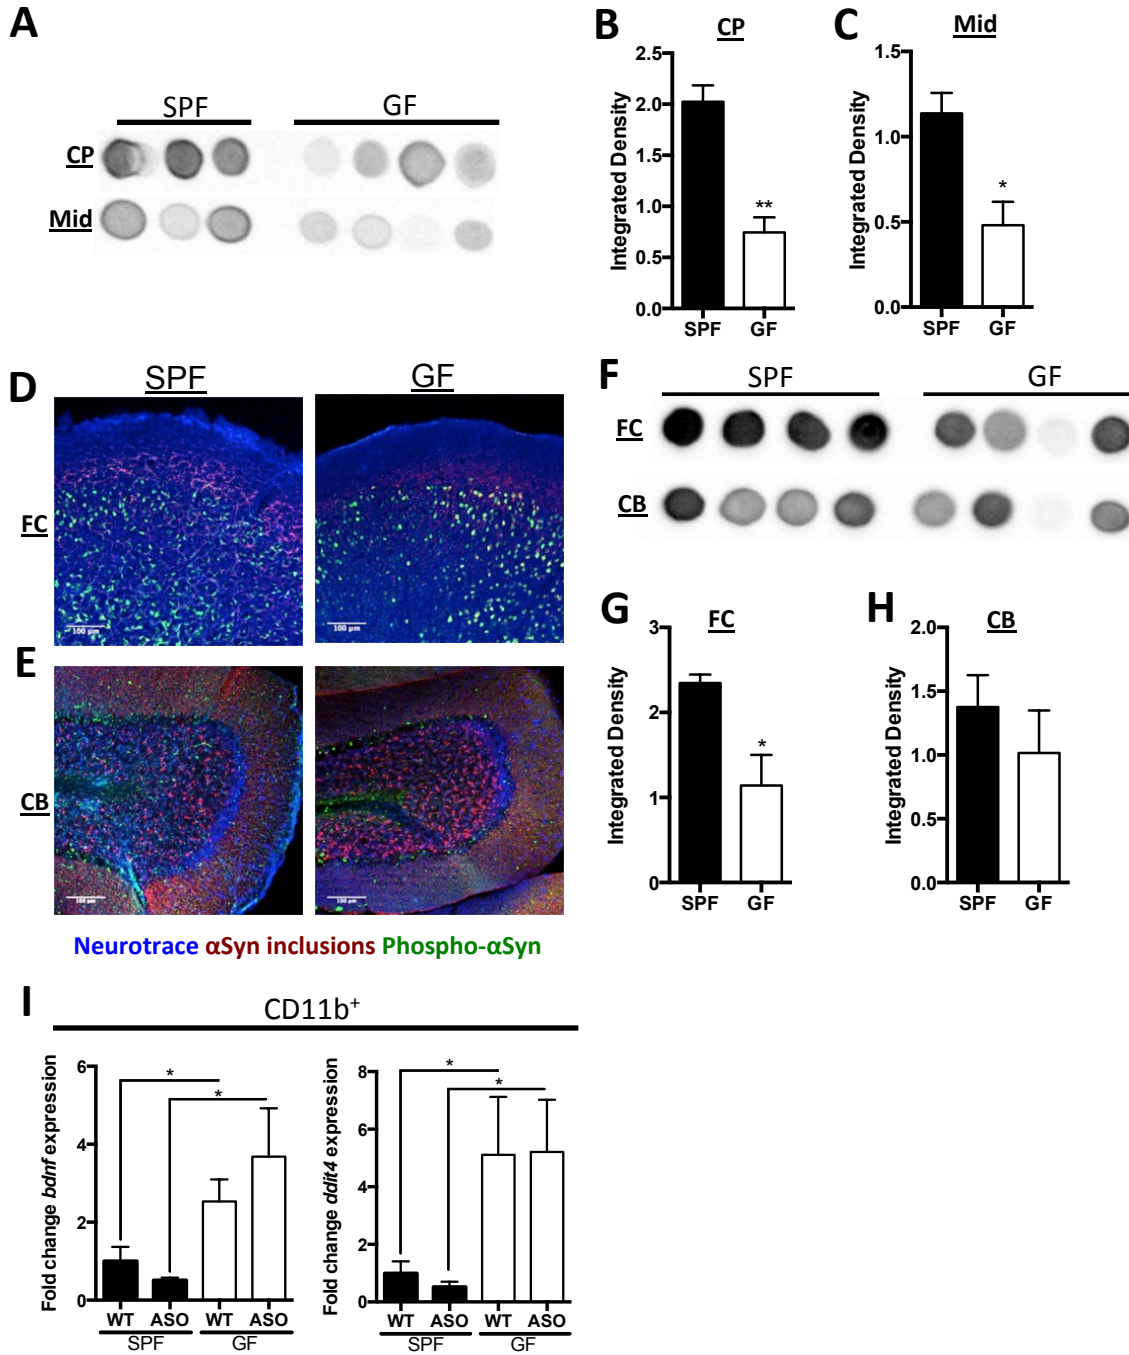

Supplement: NIHMS830352-supplement-2.pdf [file NIHMS830352-supplement-2.pdf]

Figure S3

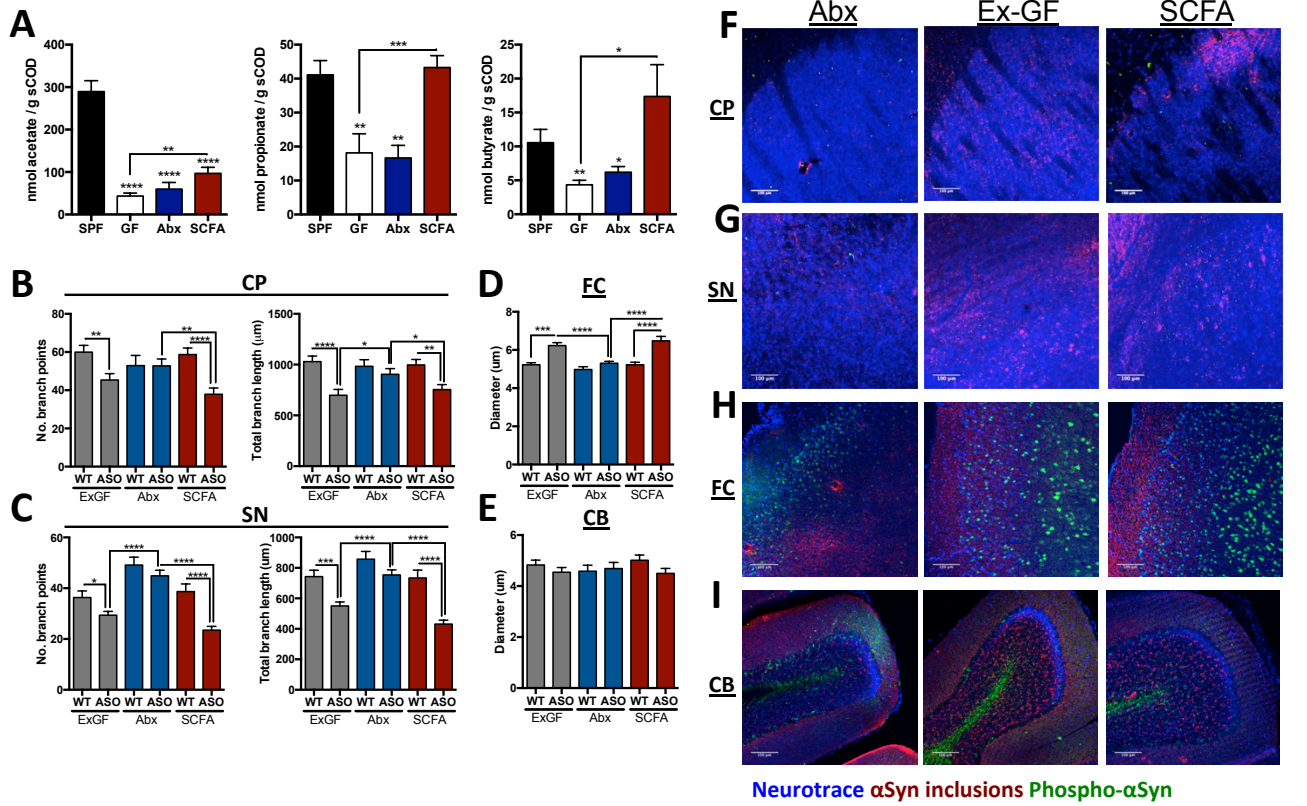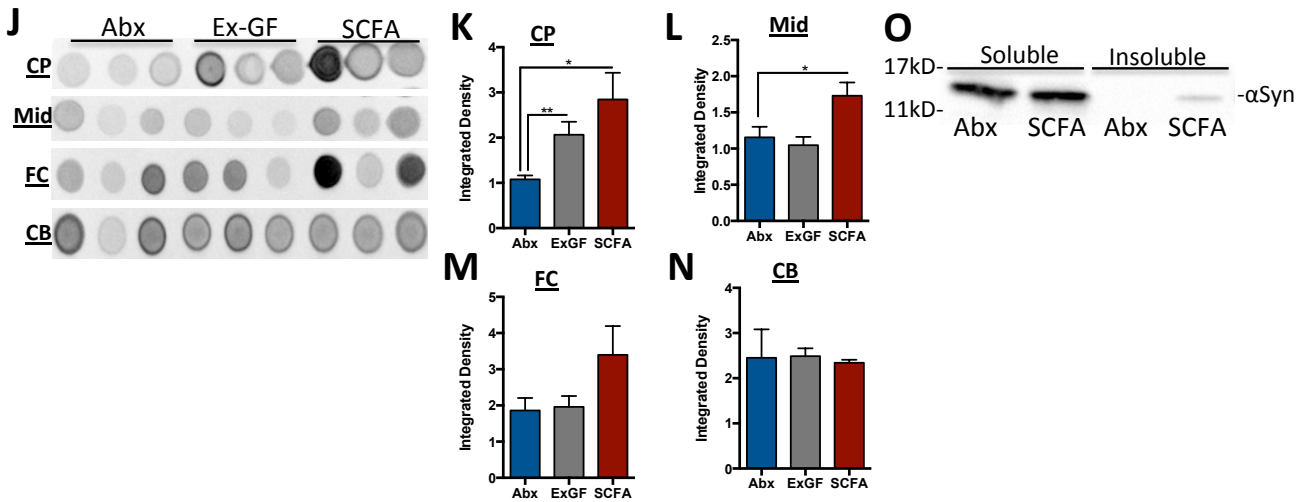

Supplement: NIHMS830352-supplement-3.pdf [file NIHMS830352-supplement-3.pdf]

Figure S4

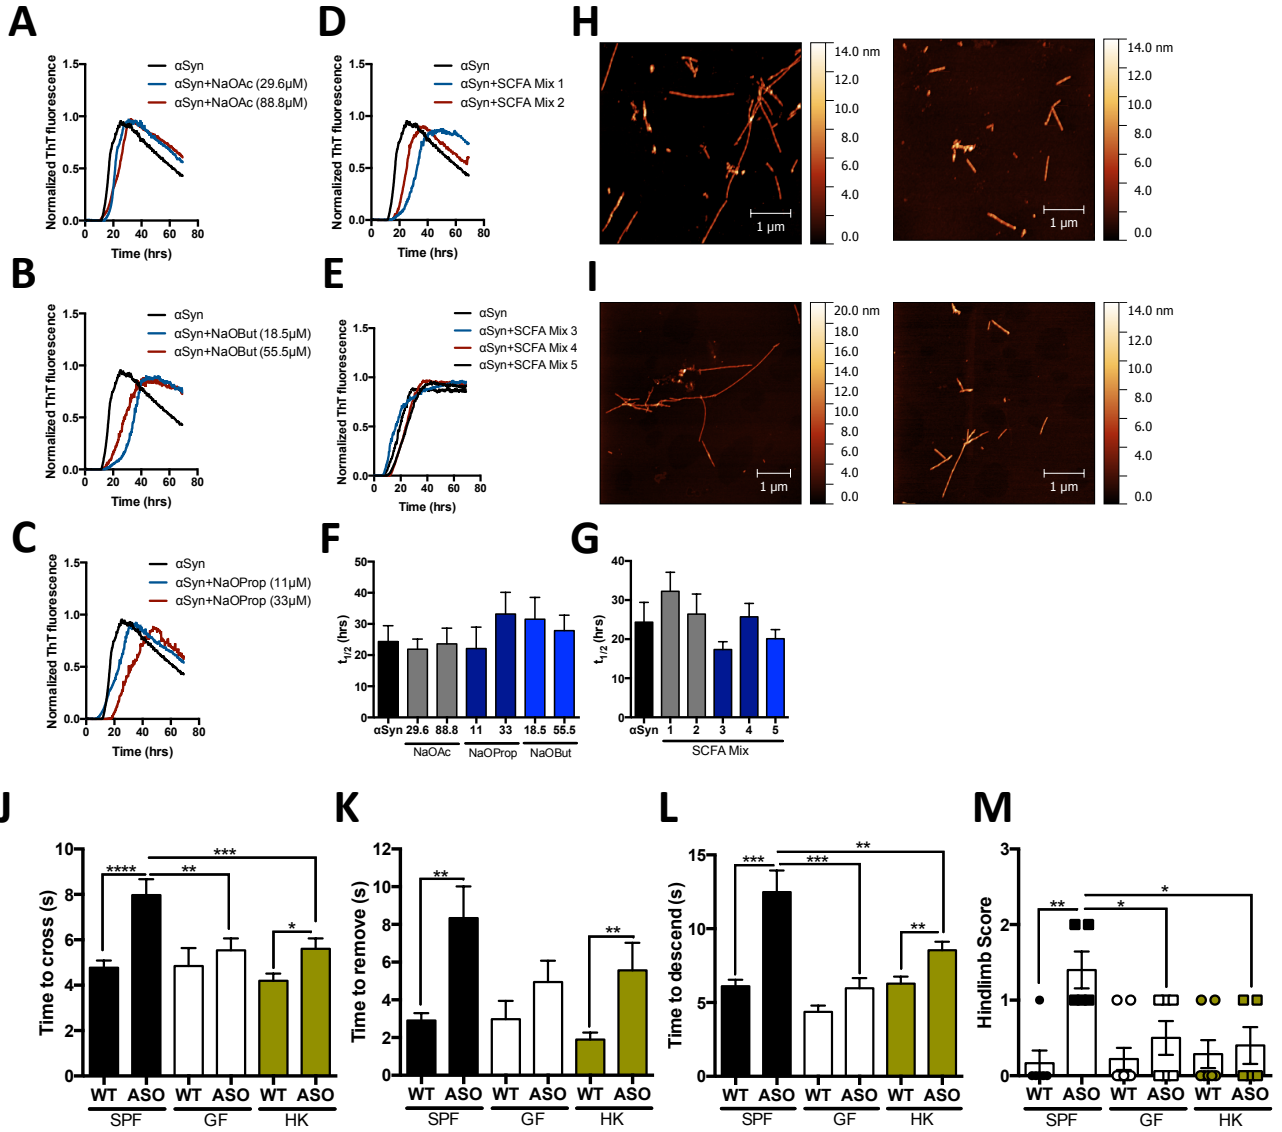

Supplement: NIHMS830352-supplement-4.pdf [file NIHMS830352-supplement-4.pdf]

Figure S5

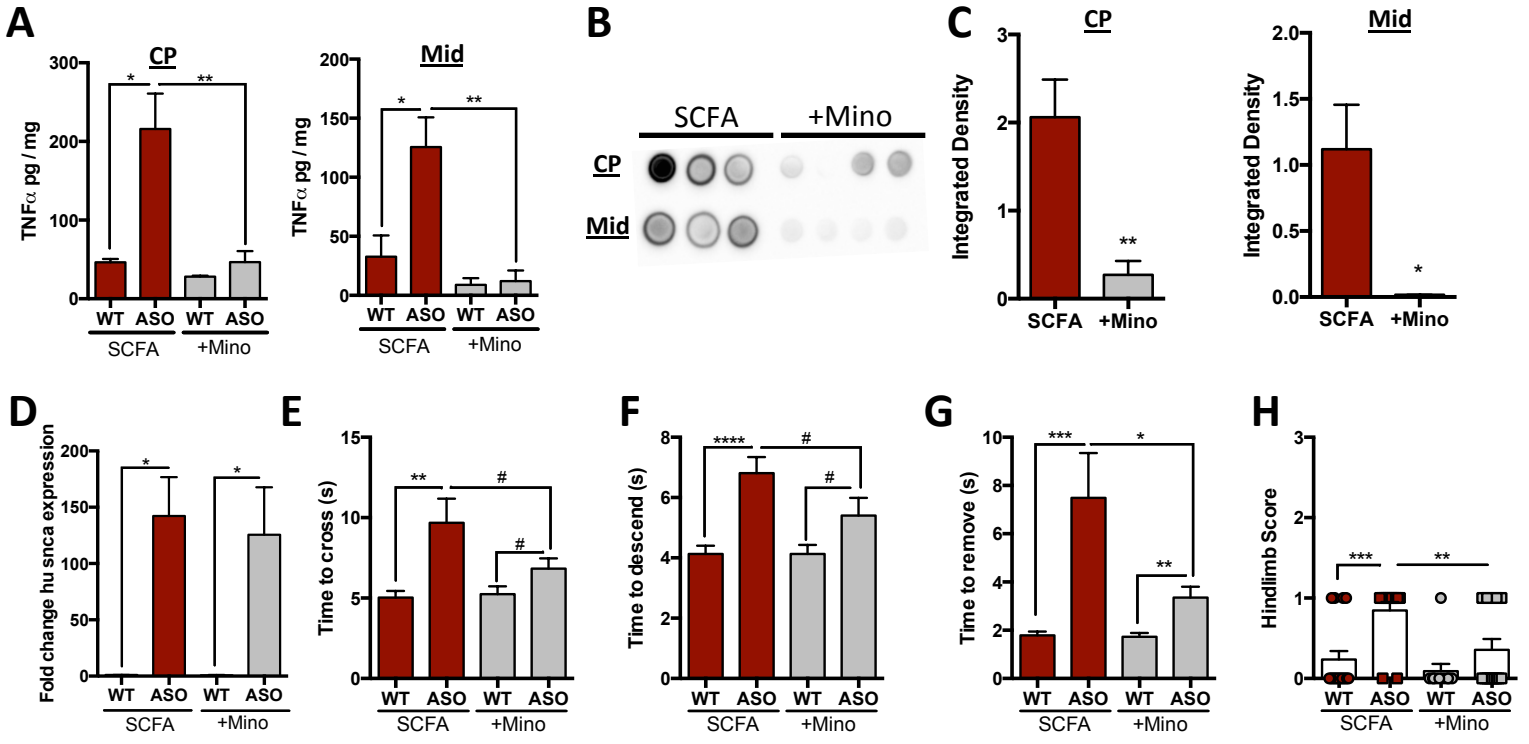

Supplement: NIHMS830352-supplement-5.pdf [file NIHMS830352-supplement-5.pdf]

Figure S6

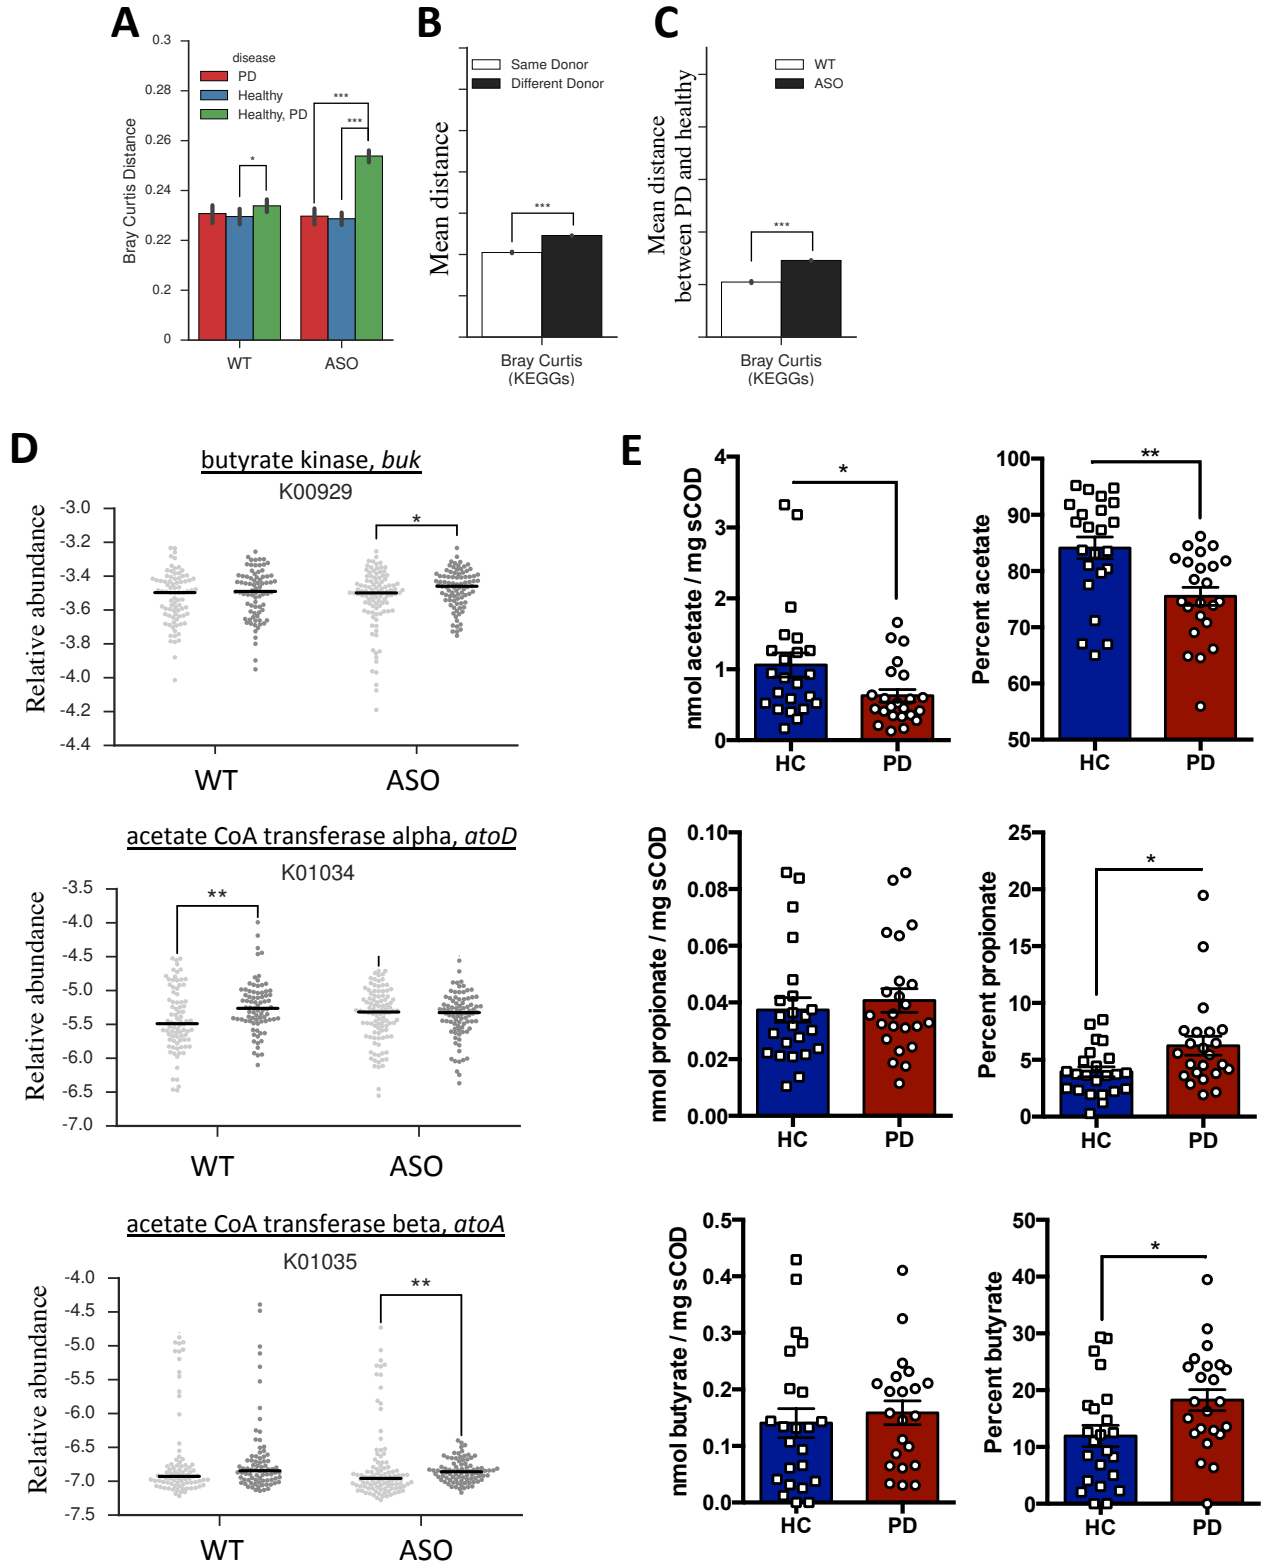

Supplement: NIHMS830352-supplement-6.pdf [file NIHMS830352-supplement-6.pdf]

Figure S7

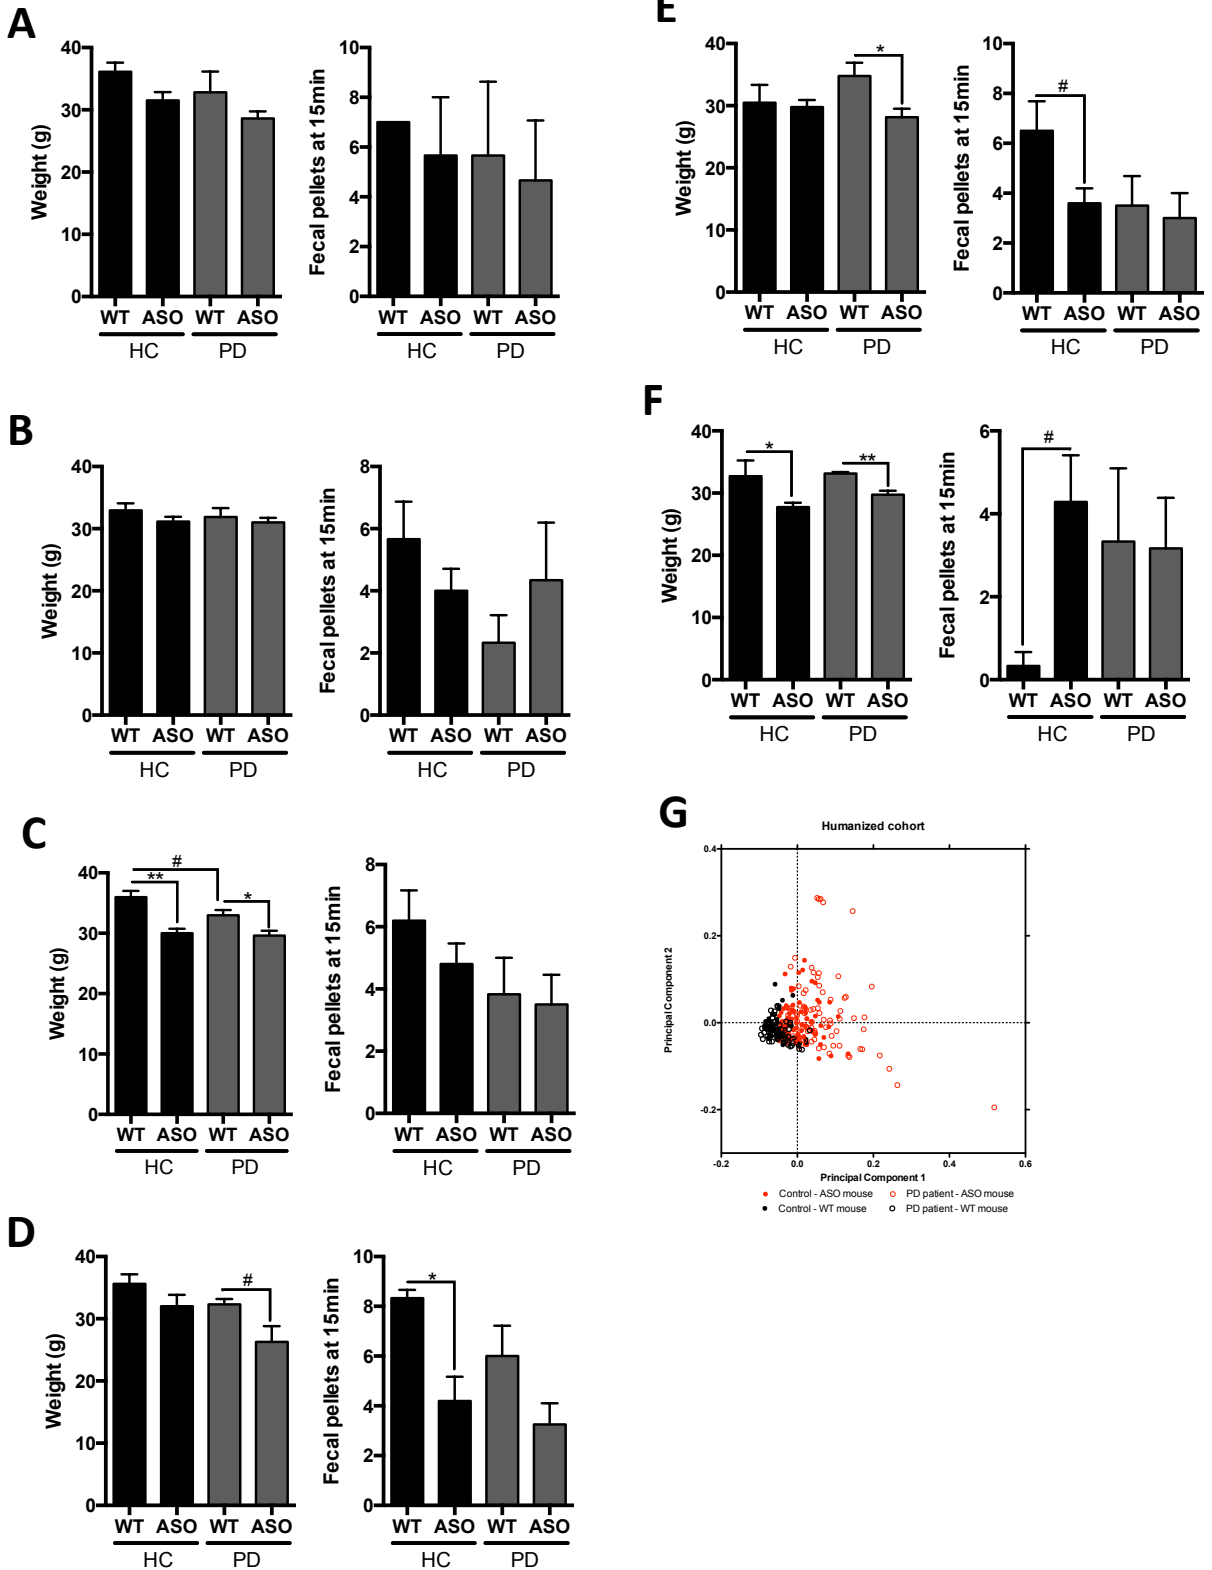

Supplement: NIHMS830352-supplement-7.pdf [file NIHMS830352-supplement-7.pdf]
